# Supplementary material for: Green Synthesis of Phosphorescent Carbon Dots for Anticounterfeiting and Information Encryption
Source: Sensors (Basel). 2022 Apr 12;22(8):2944. doi: 10.3390/s22082944 (PMC9026503; doi:10.3390/s22082944)
Supplement: Supplementary file 1 [file sensors-22-02944-s001.zip]

Archive with 5 entries (5 files):
- Supporting Information.pdf
- Video-S1.mp4
- Video-S2.mp4
- Video-S3.mp4
- Viodo-S4.mp4
